# Supplementary material for: Deciphering the Venomic Transcriptome of Killer-Wasp Vespa velutina
Source: PubMed Central journal article supplement (PMC5381768; doi:10.1038/srep09454), 2015-04-23
Supplement: srep09454-s1.pdf [file srep09454-s1.pdf]

## **Supplementary Information**

### **Deciphering the Venomic Transcriptome of Killer- Wasp *Vespa velutina***

Zhirui Liu, Shuanggang Chen, You Zhou, Cuihong Xie, Bifeng Zhu, Huming Zhu,  
Shupeng Liu, Wei Wang, Hongzhuan Chen, Yonghua Ji

Supplementary Figure legends:

Fig. S1: Annotation of 454 FLX+ Unigenes in GO, COG and KEGG database.

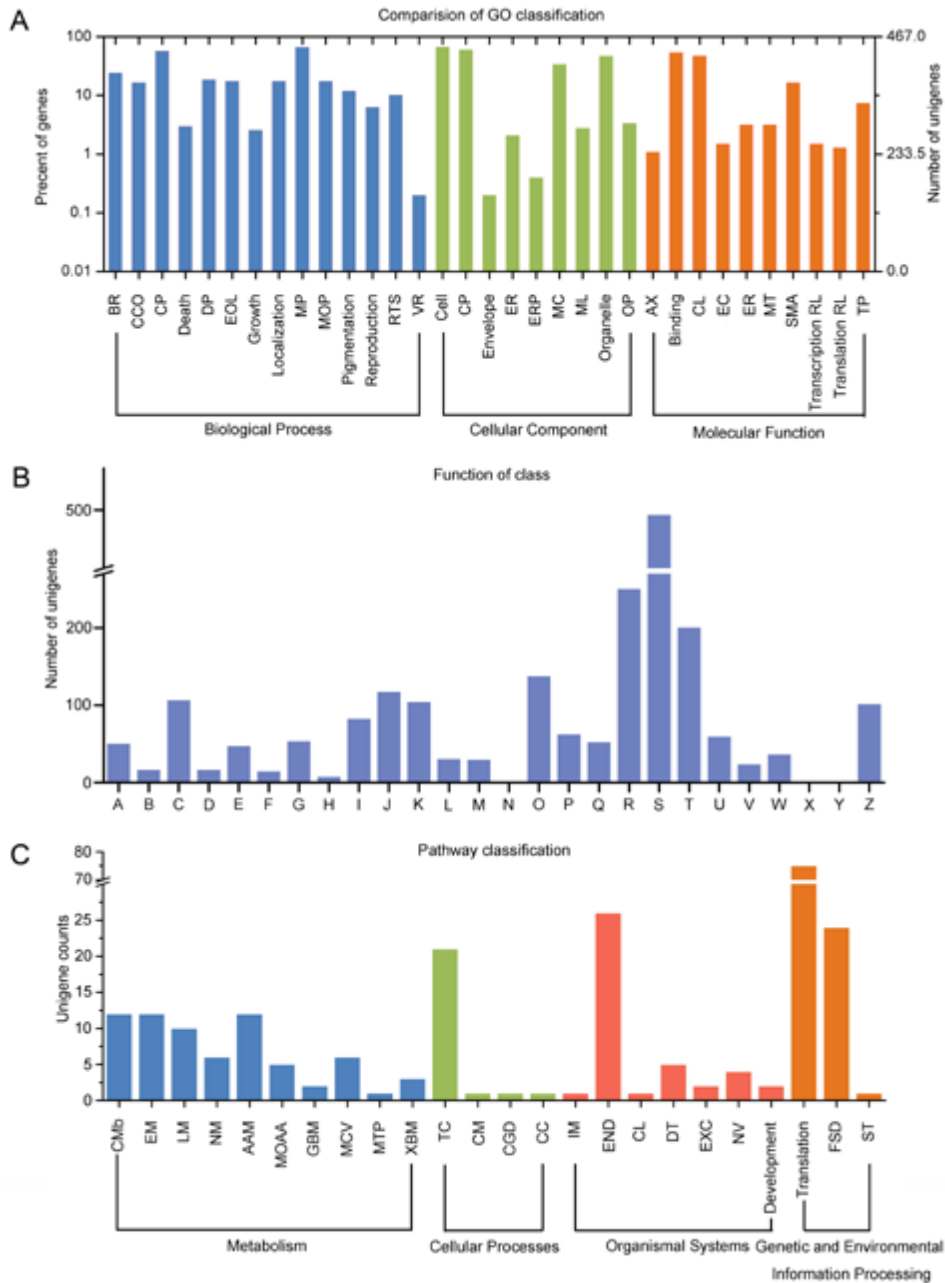

A) GO categories of the unigenes: BR: biological regulation; CCO: cellular

component organization; CP: cellular process; Death: death; DP: developmental process; EOL: establishment of localization; Growth: growth; Localization: localization; MP: metabolic process; MOP: multicellular organismal process; Pigmentation: pigmentation; Reproduction: reproduction; RTS: response to stimulus; VR: viral reproduction; Cell: cell; CP: cell part; Envelope: envelope; ER: extracellular region; ERP: extracellular region part; MC: macromolecular complex; ML: membrane-enclosed lumen; Organelle: organelle; OP: organelle part; AX: antioxidant activity; Binding: binding; CL: catalytic activity; EC: electron carrier activity; ER: enzyme regulator activity; MT: molecular transducer activity; SMA: structural molecule activity; Transcription RL: transcription regulator activity; Translation RL: translation regulator activity; TP: transporter activity;

#### B) COG classification of the unigenes.

A: RNA processing and modification; B: Chromatin structure and dynamics; C: Energy production and conversion; D: Cell cycle control, cell division, chromosome partitioning; E: Amino acid transport and metabolism; F: Nucleotide transport and metabolism; G: Carbohydrate transport and metabolism; H: Coenzyme transport and metabolism; I: Lipid transport and metabolism; J: Translation, ribosomal structure and biogenesis; K: Transcription; L: Replication, recombination and repair; M: Cell wall/membrane/envelope biogenesis; N: Cell motility; O: Posttranslational modification, protein turnover, chaperones; P: Inorganic ion transport and metabolism;

Q: Secondary metabolites biosynthesis, transport and catabolism; R: General function prediction only; S: Function unknown; T: Signal transduction mechanisms; U: Intracellular trafficking, secretion, and vesicular transport; V: Defense mechanisms; W: Extracellular structures; Y: Nuclear structure; Z: Cytoskeleton

#### C) KEGG pathways of the unigenes

CMb: Carbohydrate Metabolism; EM: Energy Metabolism; LM: Lipid Metabolism; NM: Nucleotide Metabolism; AAM: Amino Acid Metabolism; MOAA: Metabolism of Other Amino Acids; GBM: Glycan Biosynthesis and Metabolism; MCV: Metabolism of Cofactors and Vitamins; MTP: Metabolism of Terpenoids and Polyketides; XBM: Xenobiotics Biodegradation and Metabolism; TC: Transport and Catabolism; CM: Cell Motility; CGD: Cell Growth and Death; CC: Cell Communication; IM: Immune System; END: Endocrine System; CL: Circulatory System; DT: Digestive System; EXC: Excretory System; NS: Nervous System; Development: Development; Translation: Translation; FSD: Folding, Sorting and Degradation; ST: Signal Transduction.

**Fig. S2: Anotation of Illumina Unigenes annotation in GO COG and KEGG database.**

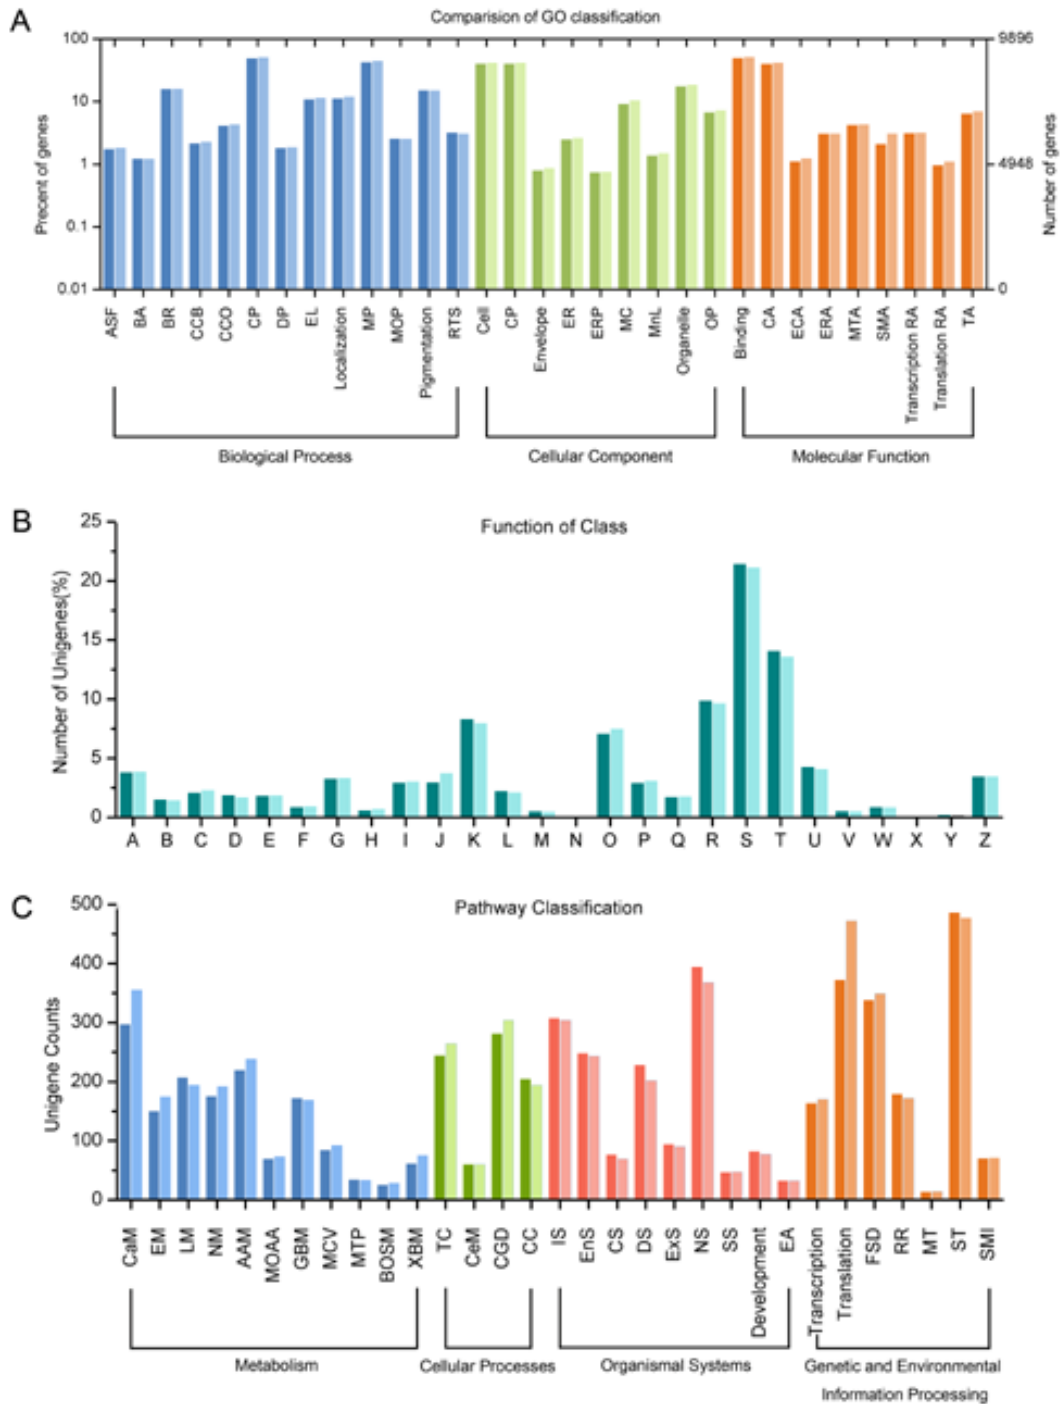

The percentage of unigenes in Wa1p and Wa2p were presented in deep and light colors, respectively.

#### A. GO categories of the unigenes.

ASF: anatomical structure formation; BA: biological adhesion; BR: biological regulation; CCB: cellular component biogenesis; CCO: cellular component organization; CP: cellular process; DP: developmental process; EL: establishment of localization; Localization: localization; MP: metabolic process; MOP: multicellular organismal process; Pigmentation: pigmentation; RTS: response to stimulus Cell: cell; CP: cell part; Envelope: envelope; ER: extracellular region ERP: extracellular region part; MC: macromolecular complex; ML: membrane-enclosed lumen; Organelle: organelle; OP: organelle part; Binding: binding; CL: catalytic activity; EC: electron carrier activity; ER: enzyme regulator activity; MT: molecular transducer activity; SMA: structural molecule activity; Transcription RL: transcription regulator activity; Translation RL: translation regulator activity; TP: transporter activity.

#### B. COG classification of the unigenes.

A: RNA processing and modification; B: Chromatin structure and dynamics; C: Energy production and conversion; D: Cell cycle control, cell division, chromosome partitioning; E: Amino acid transport and metabolism; F: Nucleotide transport and metabolism; G: Carbohydrate transport and metabolism; H: Coenzyme transport and

metabolism; I: Lipid transport and metabolism; J: Translation, ribosomal structure and biogenesis; K: Transcription; L: Replication, recombination and repair; M: Cell wall/membrane/envelope biogenesis; N: Cell motility; O: Posttranslational modification, protein turnover, chaperones; P: Inorganic ion transport and metabolism; Q: Secondary metabolites biosynthesis, transport and catabolism; R: General function prediction only; S: Function unknown; T: Signal transduction mechanisms; U: Intracellular trafficking, secretion, and vesicular transport; V: Defense mechanisms; W: Extracellular structures; Y: Nuclear structure; Z: Cytoskeleton.

#### C.KEGG pathways of the unigenes

CMb: Carbohydrate Metabolism; EM: Energy Metabolism; LM: Lipid Metabolism  
NM: Nucleotide Metabolism; AAM:Amino Acid Metabolism; MOAA: Metabolism of Other Amino Acids; GBM: Glycan Biosynthesis and Metabolism; MCV: Metabolism of Cofactors and Vitamins; MTP: Metabolism of Terpenoids and Polyketides; BSM: Biosynthesis of Other Secondary Metabolites; XBM: Xenobiotics Biodegradation and Metabolism; TC: Transport and Catabolism; CM: Cell Motility; CGD: Cell Growth and Death; CC: Cell Communication; IM: Immune System; END: Endocrine System; CL: Circulatory System; DT: Digestive System; EXC: Excretory System; NV: Nervous System; SS: Sensory System; Development: Development; EA: Environmental Adaptation; Transcription: Transcription; Translation: Translation  
FSD: Folding, Sorting and Degradation; RR: Replication and Repair; MT: Membrane

Transport; ST: Signal Transduction; SMI: Signaling Molecules and Interaction.

**Fig. S3: Relative quantification analysis of 36 differentially expressed unigenes in Wa1p and Wa2p.**

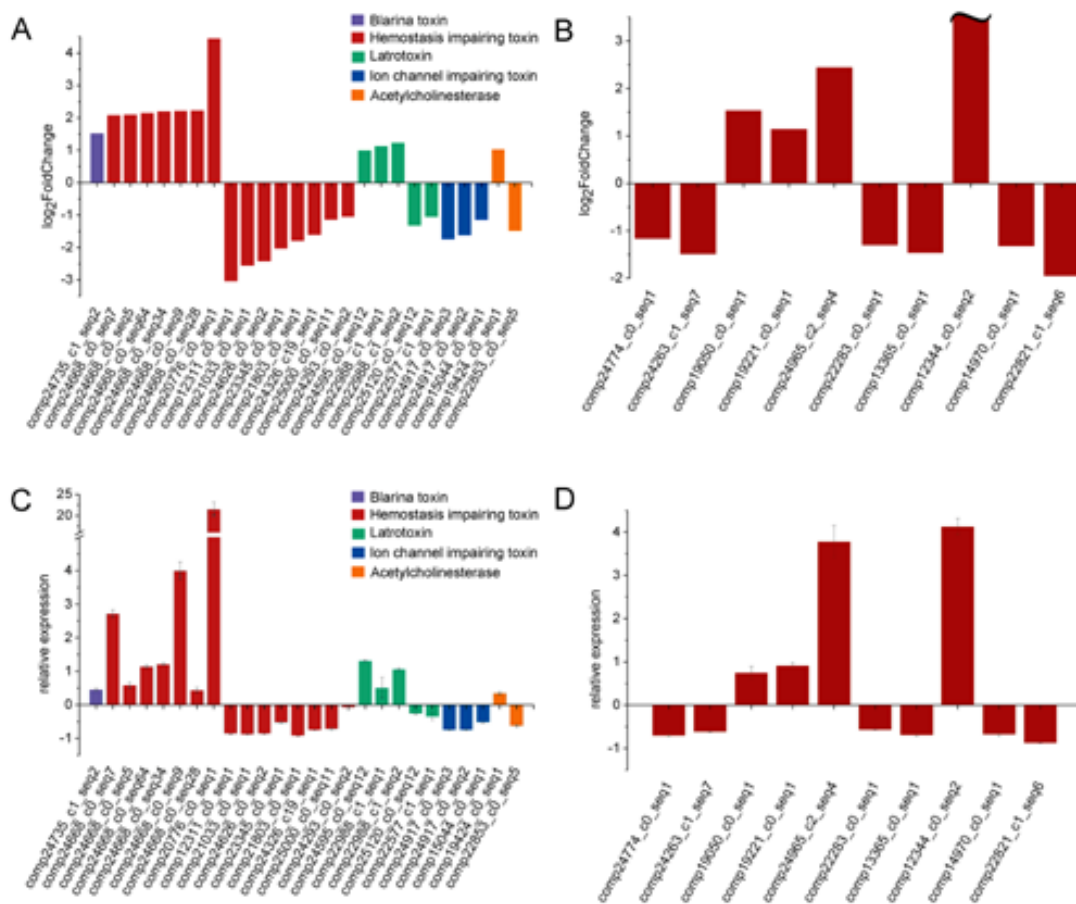

Log<sub>2</sub>Fold of changes for the 26 putative toxins (A) and 10 enzymes (B) considered to be differential expressed after venom extraction; (C-D) qRT-PCR validation for expression level of the above unigenes.



**Fig. S4: Reads quality and length distributions of transcriptome of *V. velutina* venom sequenced by 454 GS-FLX+.**

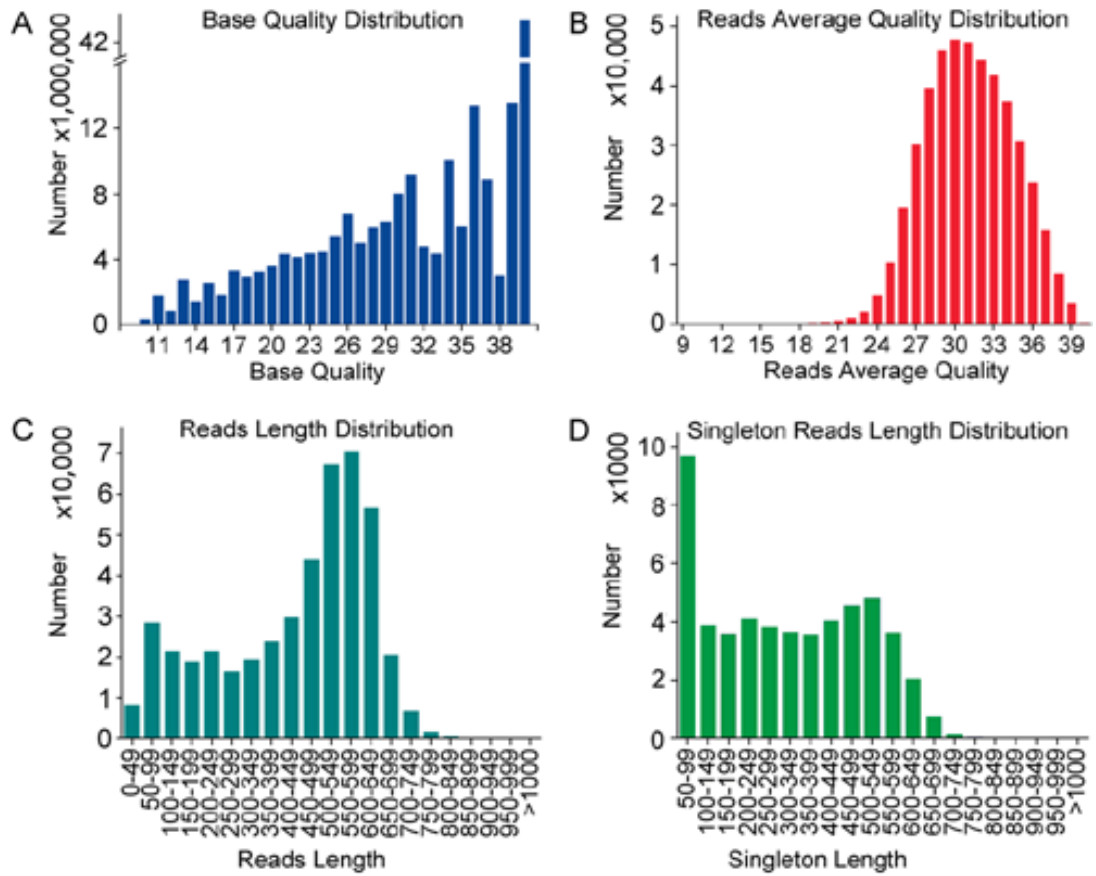

Fig. S5: Quality control and sequence content for reads obtained from HiSeq2000.

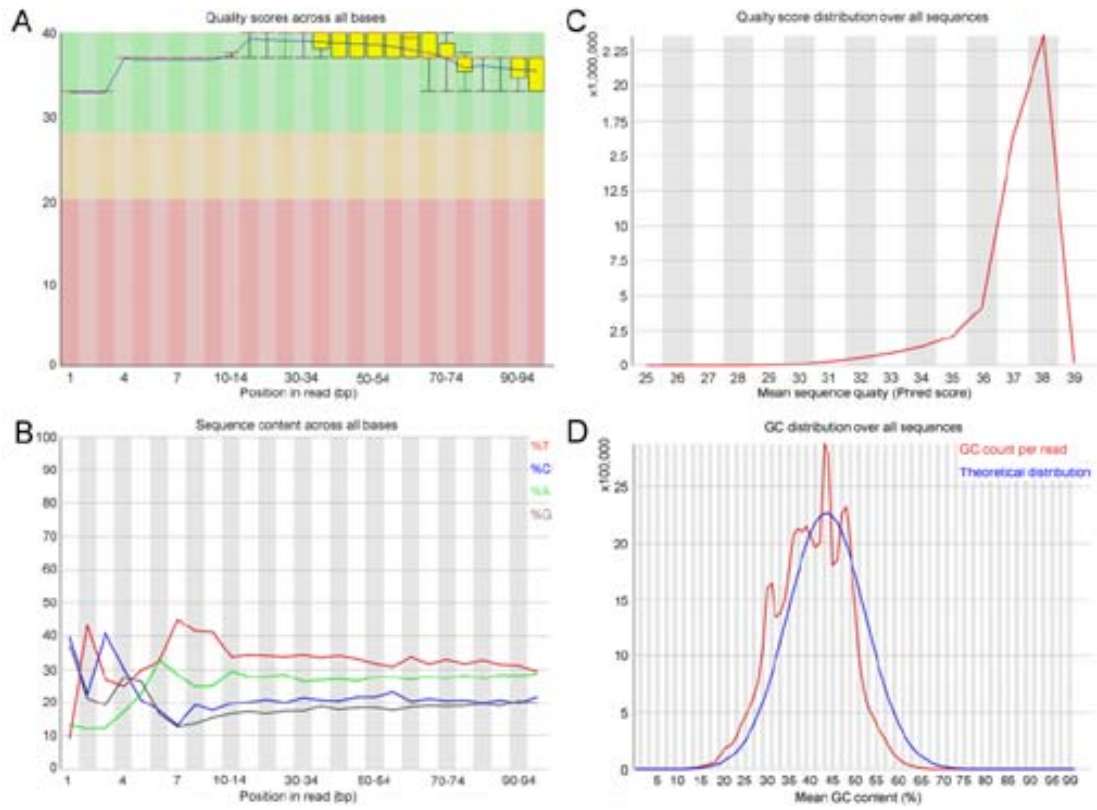

**Fig. S6 Electrophoretic analyses of venom proteins.**

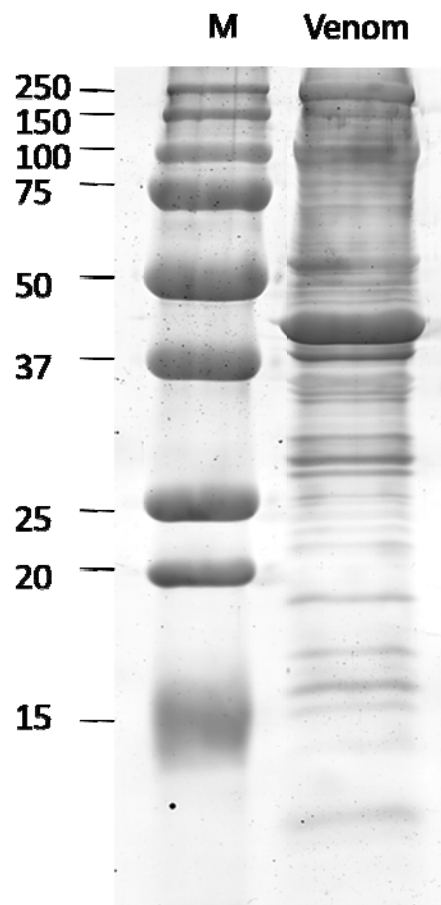

Venom reservoirs of *V. velutina* were dissected in PBS buffer supplemented with a protease inhibitors cocktail (PI; Roche) and residual tissues were removed by centrifugation. The total protein content of 20  $\mu\text{g}$  venom reservoirs was run on a 10% SDS-PAGE under reducing conditions (right). The separated proteins were visualized by Colloidal Coomassie staining. Molecular weight standards (left) were in kDa.

**Supplementary table:**

**Table S1: Primers used for qRT-PCR validation of putative toxin unigenes (No.1-26) and enzymes for toxins synthesis or performances (No.27-36)**

| No. | Primer | Sequence(5' -3' )         | Location(5' ) | Product(bp) |
|-----|--------|---------------------------|---------------|-------------|
| 1   | S      | CTCATTTTGTGCATACATGACATAC | 377           | 218         |
|     | A      | TTCTTTTGGTTCTGGATGTGC     | 595           |             |
| 2   | S      | GGAGGGATTATAGTCGAAGCTAG   | 223           | 339         |
|     | A      | AGCAACCTTGGCCCATAGAA      | 562           |             |
| 3   | S      | TTCAAACGACGATACCTATGAC    | 2097          | 133         |
|     | A      | CCTACACGGCATAACCGCTATT    | 2230          |             |
| 4   | S      | CACAAGGTAGTTTTTCCTGTCTT   | 1406          | 161         |
|     | A      | CTCCAGCAATATTTCTACTCTTC   | 1567          |             |
| 5   | S      | AGAGGATTGCCGAGACATAGAC    | 2247          | 196         |
|     | A      | TTTGTATCCTATTCGCATGAG     | 2443          |             |
| 6   | S      | GCAGAGGGGAGGGATTATAGTC    | 216           | 146         |
|     | A      | AGACCTTGTTGACTCTAGGA      | 362           |             |
| 7   | S      | CACAAGGTAGTTTTTCCTGTCTTA  | 1656          | 183         |
|     | A      | CACTTAATATCACACTCATAAGCTC | 1839          |             |
| 8   | S      | AACATGATGAAACTCATTCTCTTCG | 1             | 174         |
|     | A      | ATTACTTGAAGTTAAACCCCATTCG | 174           |             |
| 9   | S      | AACGAACAAGAAACGCATAATG    | 84            | 162         |
|     | A      | AACAATGAAGCGCAGTAATGAC    | 246           |             |
| 10  | S      | CCTTCCTCTCGATCAAACAAAC    | 203           | 224         |
|     | A      | ATTCCTATTTGAGTGCGATTGA    | 427           |             |

|    |   |                           |      |     |
|----|---|---------------------------|------|-----|
| 11 | S | CTTGGACGACCGTGTATAACT     | 469  | 191 |
|    | A | GACGAAGCATAGAATGAGAATC    | 660  |     |
| 12 | S | AACGACGAGGACGACAATCTT     | 474  | 227 |
|    | A | TTGGAACGGATCTCAGTCTCAC    | 701  |     |
| 13 | S | AGGCAAAGGAAACATCGACTTAG   | 176  | 147 |
|    | A | TTGTTGGGGGGATAGATGACGA    | 323  |     |
| 14 | S | CCATAATATGAAGTAAAGAGAATCC | 1150 | 170 |
|    | A | GGCAAGGTCTTACTGGAAATG     | 1320 |     |
| 15 | S | TACCTTCGCAAAGATCCACTC     | 115  | 182 |
|    | A | TGATGAAAACCTCAACTTGGG     | 297  |     |
| 16 | S | ACACATACGATTACATTGGGACC   | 2626 | 149 |
|    | A | CGACCGATTAGTACAGATTTGATT  | 2775 |     |
| 17 | S | CAAGAGATACGAGGTGGCGTTT    | 963  | 169 |
|    | A | CACGTCTGTGATCATCGTTCGA    | 1132 |     |
| 18 | S | ACCTTGTTCTATCAAATACTCTGC  | 2423 | 212 |
|    | A | CTTTCTATAGTAAAGTGTCTTGTGG | 2635 |     |
| 19 | S | TGCTATAATTACATGTTTGACAAAG | 1539 | 191 |
|    | A | CTTTCTATAGTAAAGTGTCTTGTGG | 1730 |     |
| 20 | S | AAGTTTTAGTGCTGTTCAATGC    | 1184 | 236 |
|    | A | ACATTTGTACCACCTTATAGATACG | 1420 |     |
| 21 | S | GTTCACTTTAACGACCTGACC     | 1332 | 179 |
|    | A | GATCTCCACAGAGATTTCCAC     | 1511 |     |
| 22 | S | CTTTTCTTCTCAAGTTGTCAAGG   | 233  | 178 |
|    | A | GCTGGCATATTTATTCATCCC     | 411  |     |
| 24 | S | ACCAGTTGCCTCAAACGATTA     | 677  | 188 |
|    | A | GATCCATTCGAGATTAAGGAAAA   | 865  |     |

|    |   |                          |      |     |
|----|---|--------------------------|------|-----|
| 25 | S | GATCGAGACGAAGTTTGGATC    | 202  | 193 |
|    | A | TGAGTTGTAGGCACGGCATAG    | 395  |     |
| 26 | S | ATGTCTATACTCCGCAGATTCC   | 468  | 156 |
|    | A | ACAGTGACGACTACGATGTCCT   | 624  |     |
| 27 | S | AAAGATGGCAAACGCTACGAG    | 4232 | 174 |
|    | A | TTCAGGCATATCTCCGTTCAA    | 4406 |     |
| 28 | S | CAACGAAGGTTTTTACGGTAAA   | 1769 | 181 |
|    | A | AAAAGACTTCCTGCGGGTTC     | 1950 |     |
| 29 | S | AATGTCAAGAAAGTGGTTCGC    | 1290 | 179 |
|    | A | GTATCGCAATATCGATGGTGG    | 1469 |     |
| 30 | S | AAAAGACGAACAATAAGGACAA   | 1412 | 196 |
|    | A | AGGGAACCAGACCATAAGAGT    | 1608 |     |
| 31 | S | TAACAACCCCAAAGTAACAGC    | 1597 | 249 |
|    | A | CGTCTAGCGAGATAGATTTAGAAG | 1846 |     |
| 32 | S | ATTTATGCTGTGGGACAACCTC   | 724  | 240 |
|    | A | GAAAGCTAGATATTAGGGAGCC   | 964  |     |
| 33 | S | CTGTGATTATGGAAGACCTGC    | 672  | 180 |
|    | A | TGGAAGAGTTTTAGTGTCGTTATA | 852  |     |
| 34 | S | GATTCGATCTGATTTATAGCGA   | 314  | 198 |
|    | A | CAATATCTGAACCTGCACTGAC   | 512  |     |
| 35 | S | AAGACCAAGTTGCGAATAGTT    | 2422 | 145 |
|    | A | TTCCTTAGTTACAGATACCAGC   | 2567 |     |
| 36 | S | G TTCCTAACAAGAATGACCGT   | 354  | 200 |
|    | A | TTTATCCGCAACTAGGTATGC    | 554  |     |
